# Supplementary material for: Targeted chemotherapy overcomes drug resistance in melanoma
Source: PubMed Central journal article supplement (PMC7197350; doi:10.1101/gad.333864.119), 2020-05-01

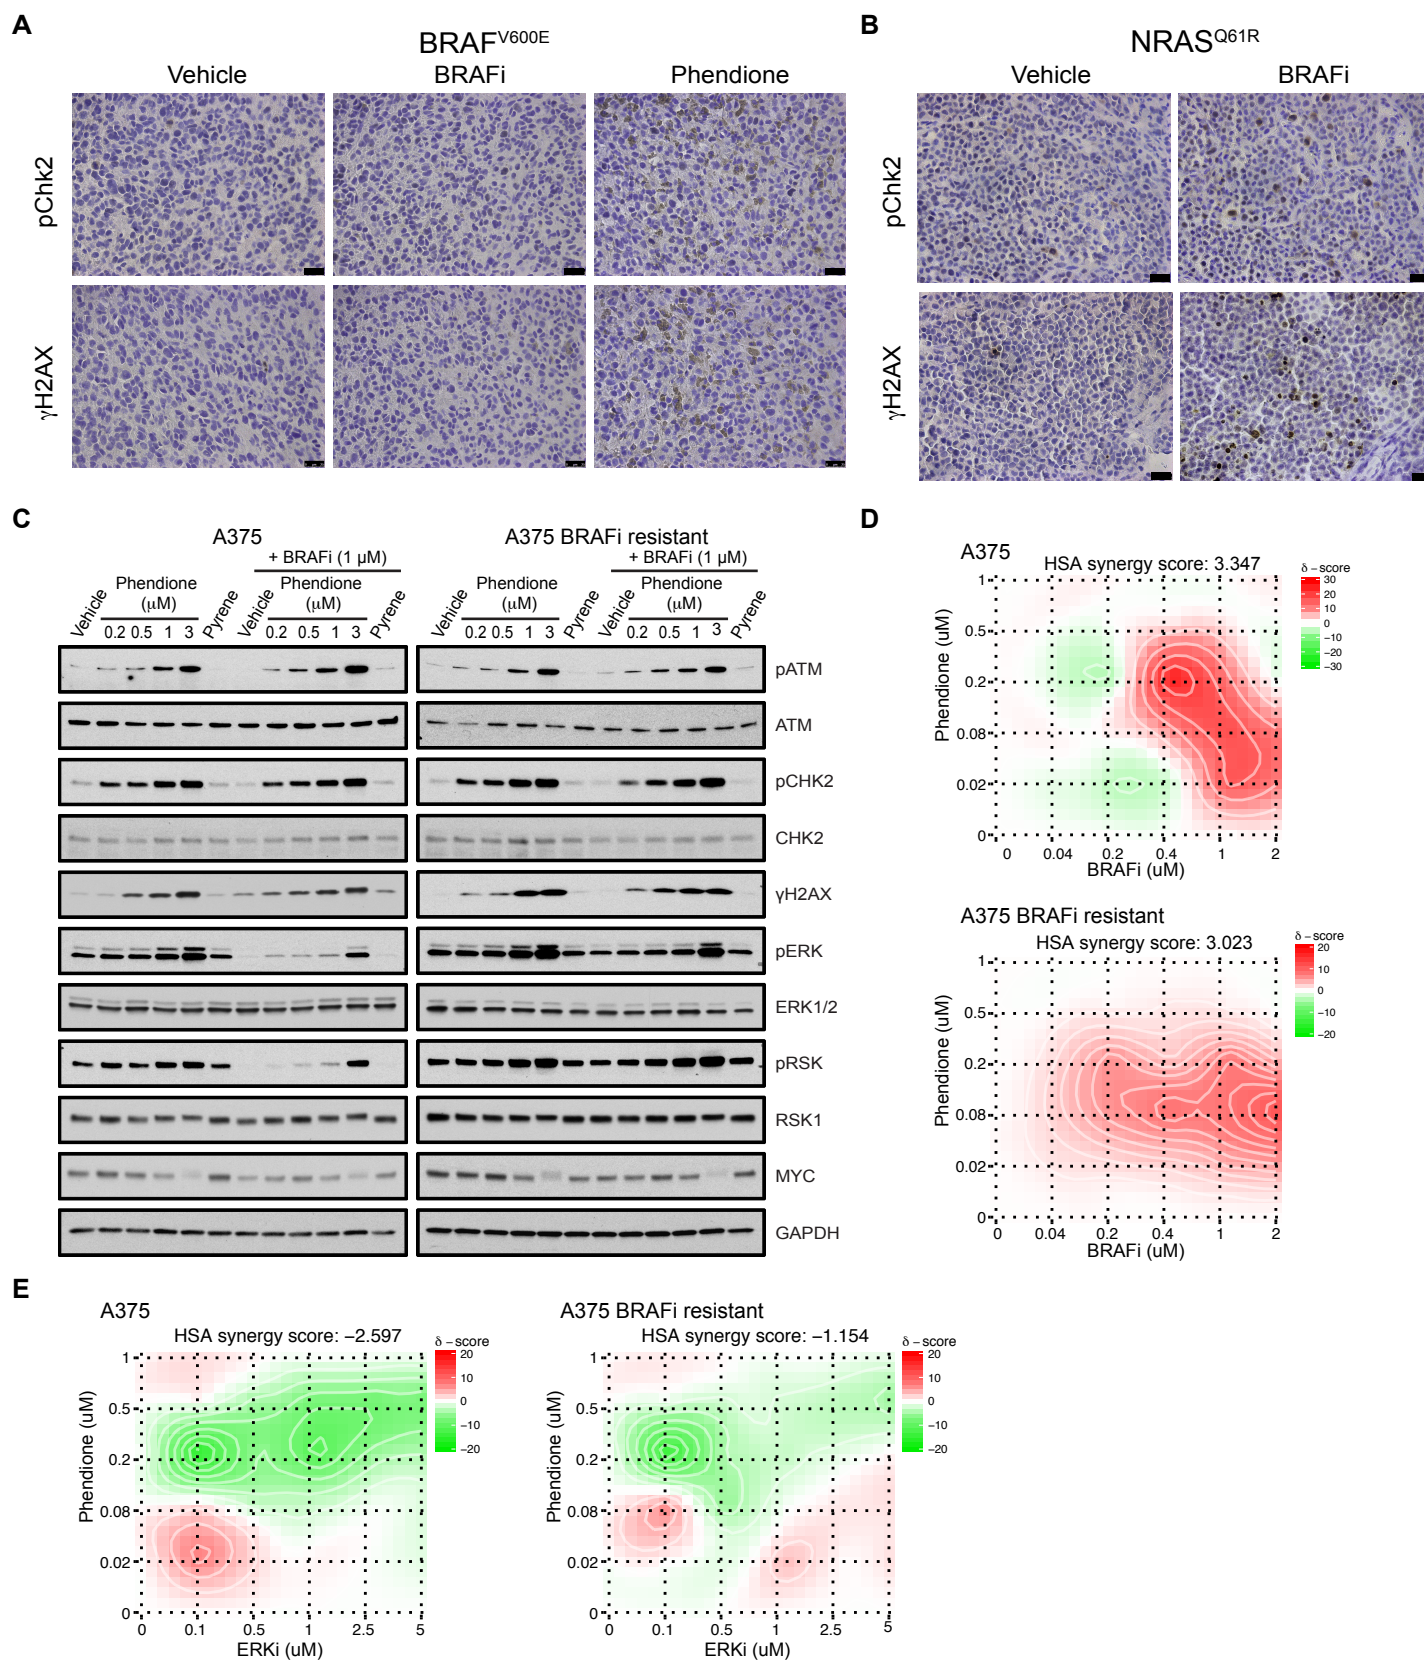

Supplement: supp_gad.333864.119_Supplemental_Fig_6.pdf [file supp_gad.333864.119_Supplemental_Fig_6.pdf]
